# Supplementary material for: Theoretical insights into single-atom catalysts for improved charging and discharging kinetics of Na–S and Na–Se batteries
Source: Royal Society of Chemistry journal article supplement (doi:10.1039/d4nr01134a), 2024-01-01
Supplement: d4nr01134a1.pdf [file d4nr01134a1.pdf]

## [Electronic Supplementary Information]

### Theoretical Insights into Single-Atom Catalysts for Improved Charging and Discharging Kinetics of Na-S and Na-Se Batteries

Mukesh Jakhar,<sup>\*,†,‡</sup> Veronica Barone,<sup>\*,†,‡</sup> and Yi Ding<sup>¶</sup>

<sup>†</sup> *Science of Advanced Materials Program, Central Michigan University, Mt. Pleasant, MI 48859, USA*

<sup>‡</sup> *Department of Physics, Central Michigan University, Mt. Pleasant, MI 48859, USA*

<sup>¶</sup> *U.S. Army DEVCOM-GVSC, Warren, MI 48397, USA*

E-mail: jakha1m@cmich.edu; baron1v@cmich.edu

DISTRIBUTION STATEMENT A. Approved for public release; distribution is unlimited.  
OPSEC #8405.

## Table of Contents

| Section                                                                                                                     | Page No. |
|-----------------------------------------------------------------------------------------------------------------------------|----------|
| Electronic Properties of g-C <sub>3</sub> N <sub>4</sub> and Phonon Spectrum Curves for SA@rg-C <sub>3</sub> N <sub>4</sub> | S3       |
| Charge Transfer and AIMD Plot for X <sub>8</sub> (X= S, Se) Species                                                         | S5       |
| Geometric Configurations of Na-pXs (X=S, Se)                                                                                | S8       |
| Geometric Configurations of Electrolyte Solvent (DOL and DME)                                                               | S13      |
| Gibbs Free Energy Profile for Sulfur/Selenium Reduction Reactions (S/SeRRs)                                                 | S14      |
| Partial Density of States (PDOS) of Na <sub>2</sub> X-SA                                                                    | S17      |

# Electronic properties of $g\text{-C}_3\text{N}_4$ and phonon spectrum curves for $\text{SA@rg-C}_3\text{N}_4$

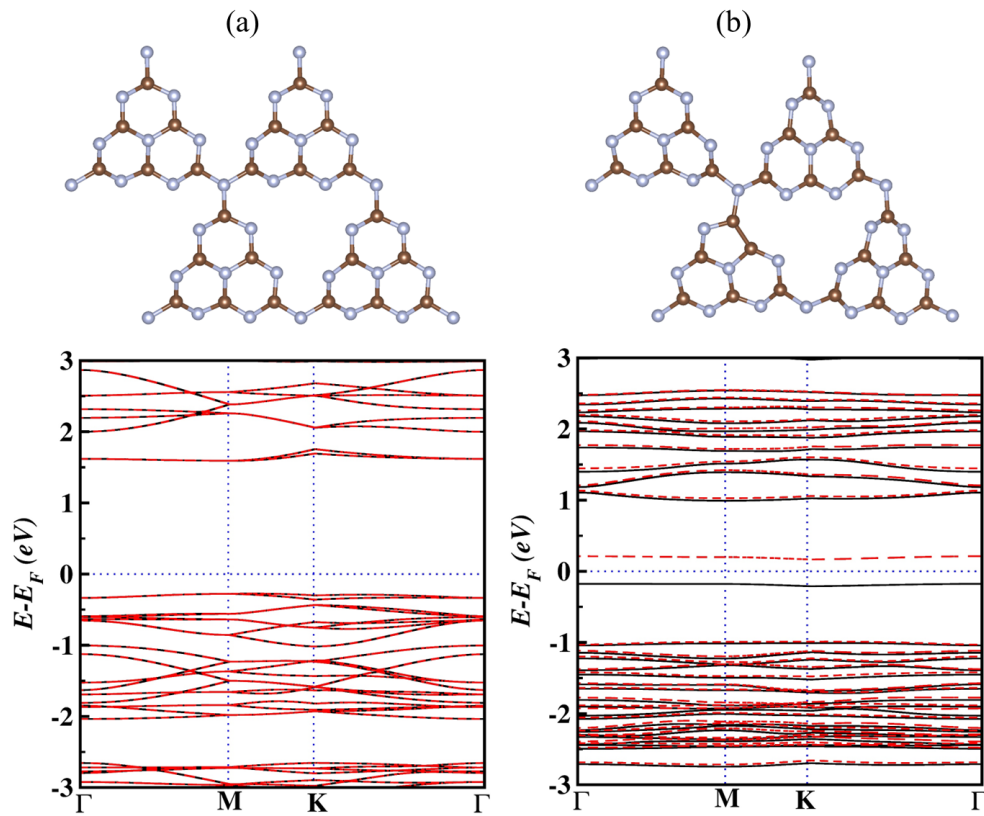

Figure S1: The optimized configuration and electronic band structure for (a)  $g\text{-C}_3\text{N}_4$  and  $\text{rg-C}_3\text{N}_4$  monolayer. Solid black and dotted red curves are spin-down and spin-up components, respectively. Fermi level is set to zero.

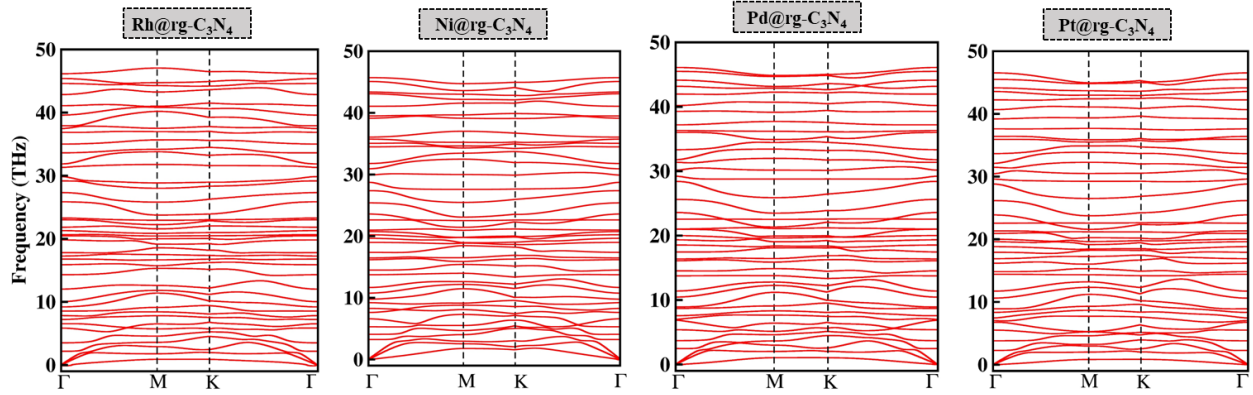

Figure S2: Phonon spectrum curves of SA@rg-C<sub>3</sub>N<sub>4</sub> (for SA= Rh, Ni, Pd, and Pt)

Table S1: The average bond lengths between the embedded single atom (SA) and its nearest neighboring N and C atoms within the 1 x 1 unit cell of a rg-C<sub>3</sub>N<sub>4</sub> monolayer.

| SA | SA-N (Å) | SA-C (Å) |
|----|----------|----------|
| Co | 1.90     | 1.76     |
| Fe | 1.93     | 1.79     |
| Ir | 2.04     | 1.87     |
| Ni | 1.90     | 1.81     |
| Pd | 2.02     | 1.92     |
| Pt | 2.01     | 1.91     |
| Rh | 2.03     | 1.86     |

# Charge Transfer and AIMD plot for $X_8$ ( $X= S, Se$ ) Species

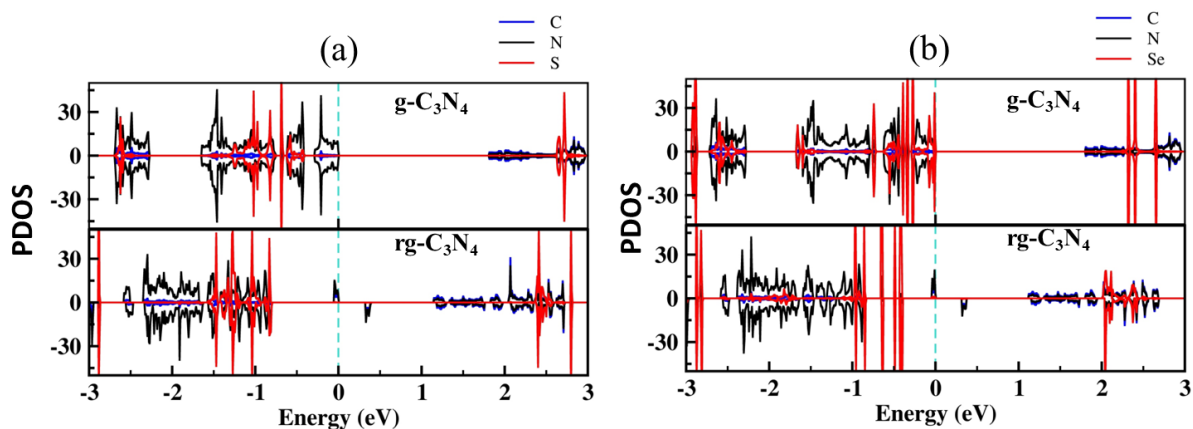

Figure S3: The calculated partial density of states (PDOS) for  $g-C_3N_4$  and  $rg-C_3N_4$  adsorbed by (a)  $S_8$  and (b)  $Se_8$  molecules

From Figure S3, it is evident that in  $g-C_3N_4$  adsorbed by  $S_8$ , there is a predominant contribution from N atoms near the Fermi level. However, in  $Se_8$ , in addition to the N atom contribution, a significant contribution from Se atoms is also observed, which can be correlated to their higher adsorption energies compared to  $S_8$ . On other hand, in  $rg-C_3N_4$ , only two small N atom peaks occur near the Fermi level corresponding to spin up and spin down, which can be correlated to their lower adsorption energies compared to pristine  $g-C_3N_4$ .

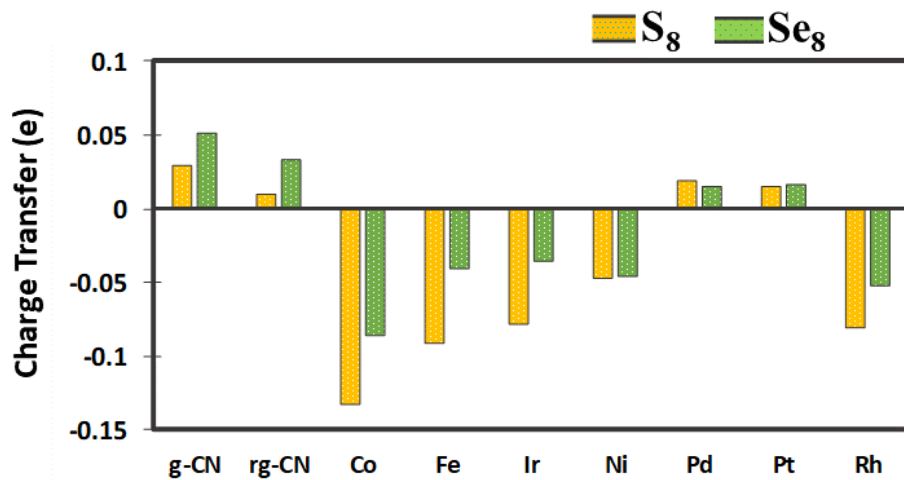

Figure S4: The charge transfer between the X<sub>8</sub> (X= S, Se) molecules and various substrates.

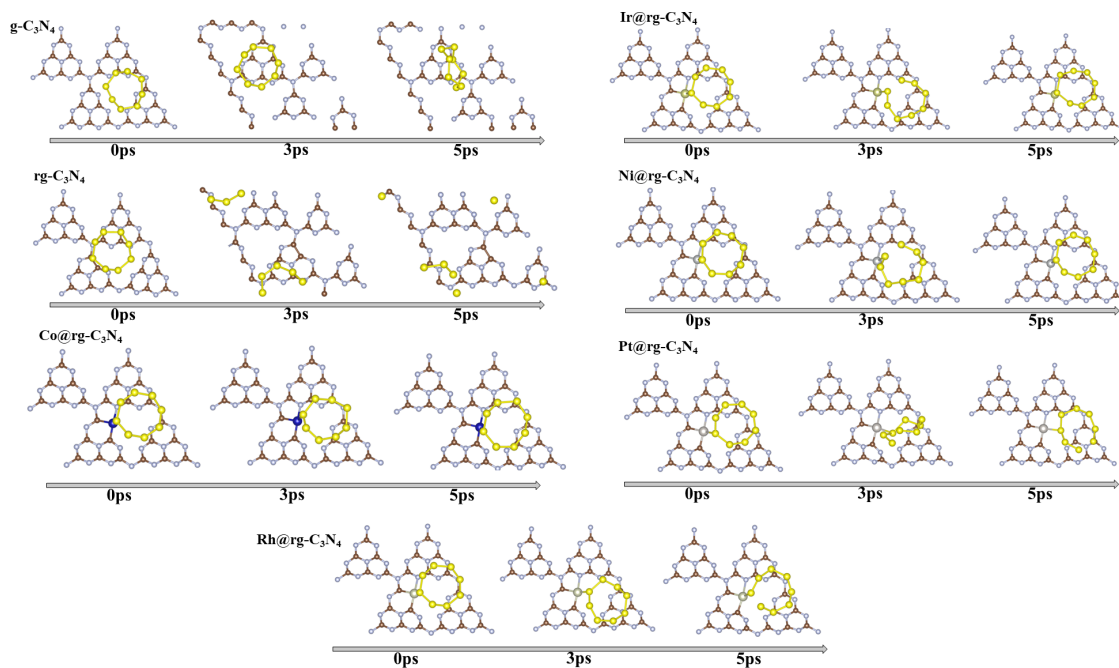

Figure S5: AIMD simulation snapshots of the adsorption of S<sub>8</sub> on g-C<sub>3</sub>N<sub>4</sub>, rg-C<sub>3</sub>N<sub>4</sub>, and SA@rg-C<sub>3</sub>N<sub>4</sub> ( SA = Co, Ir, Ni, Pt, and Rh)

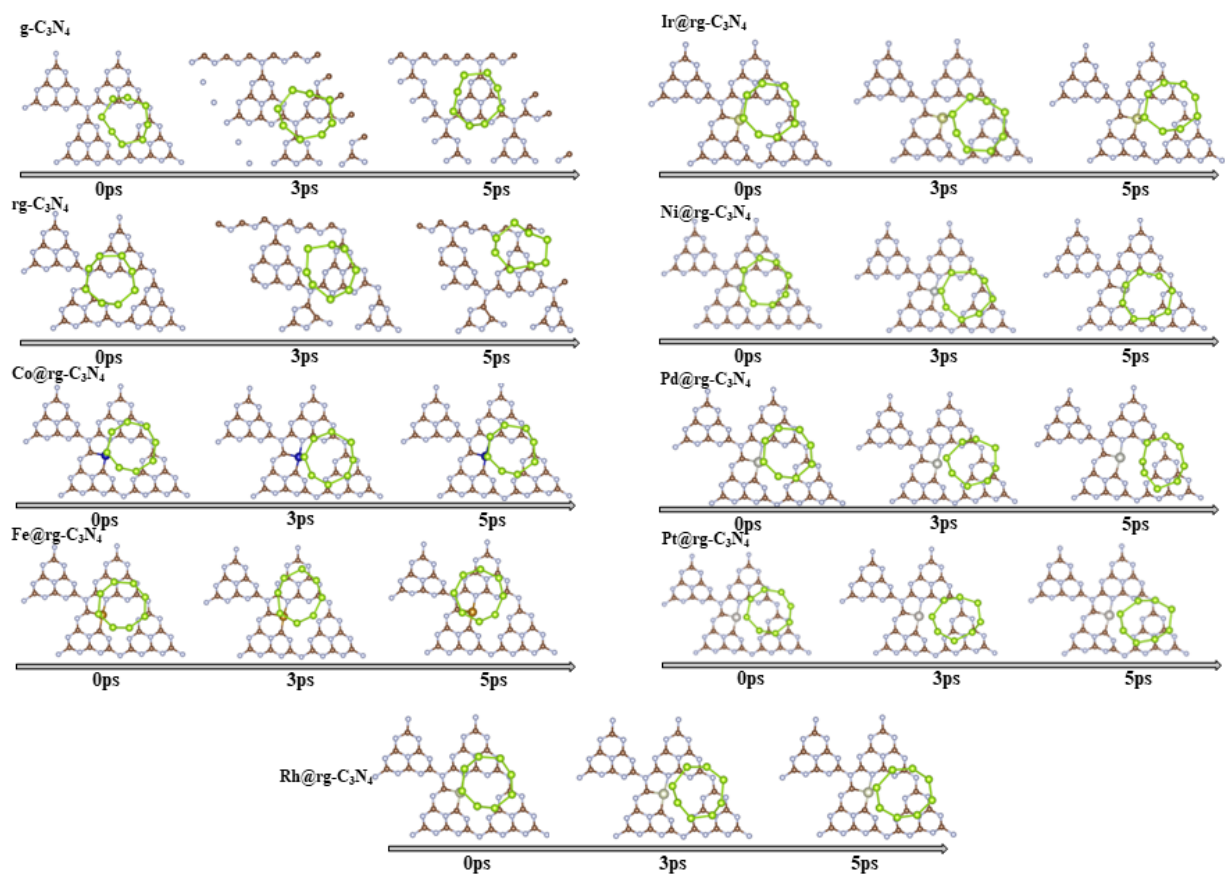

Figure S6: AIMD simulation snapshots of the adsorption of Se<sub>8</sub> on g-C<sub>3</sub>N<sub>4</sub>, rg-C<sub>3</sub>N<sub>4</sub>, and SA@rg-C<sub>3</sub>N<sub>4</sub> (SA = Co, Fe, Ir, Ni, Pd, Pt, and Rh)

## Geometric Configurations of Na-pXs (X=S, Se)

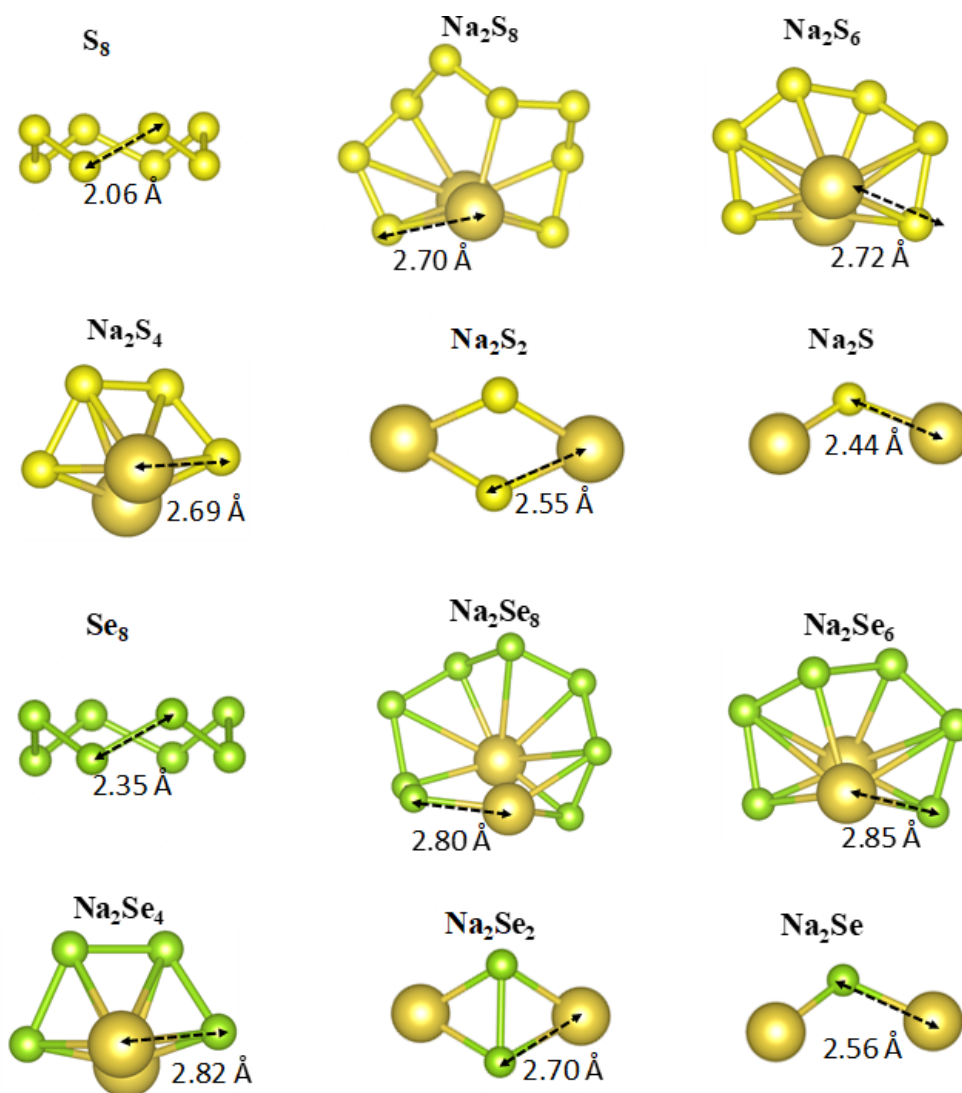

Figure S7: The optimized geometric configurations of  $X_8$  (X= S, Se) and  $Na_2X_n$  ( $n=1, 2, 4, 6, 8$ ) species.



Table S2: The bond lengths between the Na atom and its nearest neighboring X (X=S, Se) atom within the Na-pXs species.

| Na-pXs (X=S, Se) | Na-S (Å)                 | Na-Se (Å)                |
|------------------|--------------------------|--------------------------|
| $N_2X$           | 2.44 (2.44) <sup>a</sup> | 2.56 (2.57) <sup>b</sup> |
| $Na_2X_2$        | 2.55 (2.56) <sup>a</sup> | 2.70 (2.70) <sup>b</sup> |
| $Na_2X_4$        | 2.69 (2.71) <sup>a</sup> | 2.82 (2.83) <sup>b</sup> |
| $Na_2X_6$        | 2.72 (2.72) <sup>a</sup> | 2.85 (2.86) <sup>b</sup> |
| $Na_2X_8$        | 2.70 (2.76) <sup>a</sup> | 2.80 (2.81) <sup>b</sup> |

\*Here *a* and *b* represent the reference number<sup>1</sup> and<sup>2</sup> for Na-S and Na-Se bond lengths, respectively.

Table S3: The calculated charge transfer  $e^-$  from  $Na_2X_n$  ( $n=1, 4, 8$  and X=S, Se) to the  $rg-C_3N_4$  and  $SA@rg-C_3N_4$  (SA= Co, Fe, Ir Ni, Pd, Pt, and Rh) monolayer.

| Systems     | $Na_2S$ | $Na_2Se$ | $Na_2S_4$ | $Na_2Se_4$ | $Na_2S_8$ | $Na_2Se_8$ |
|-------------|---------|----------|-----------|------------|-----------|------------|
| $g-C_3N_4$  | 0.81    | 0.81     | 0.76      | 0.51       | 0.09      | 0.14       |
| $rg-C_3N_4$ | 0.86    | 0.86     | 0.85      | 0.85       | 0.46      | 0.52       |
| Co          | 0.66    | 0.71     | 0.33      | 0.37       | 0.19      | 0.21       |
| Fe          | 0.61    | 0.65     | 0.29      | 0.33       | 0.17      | 0.19       |
| Ir          | 0.69    | 0.75     | 0.40      | 0.47       | 0.25      | 0.33       |
| Ni          | 0.63    | 0.68     | 0.38      | 0.42       | 0.23      | 0.30       |
| Pd          | 0.61    | 0.66     | 0.36      | 0.40       | 0.26      | 0.32       |
| Pt          | 0.68    | 0.73     | 0.43      | 0.48       | 0.31      | 0.32       |
| Rh          | 0.65    | 0.69     | 0.35      | 0.41       | 0.22      | 0.28       |

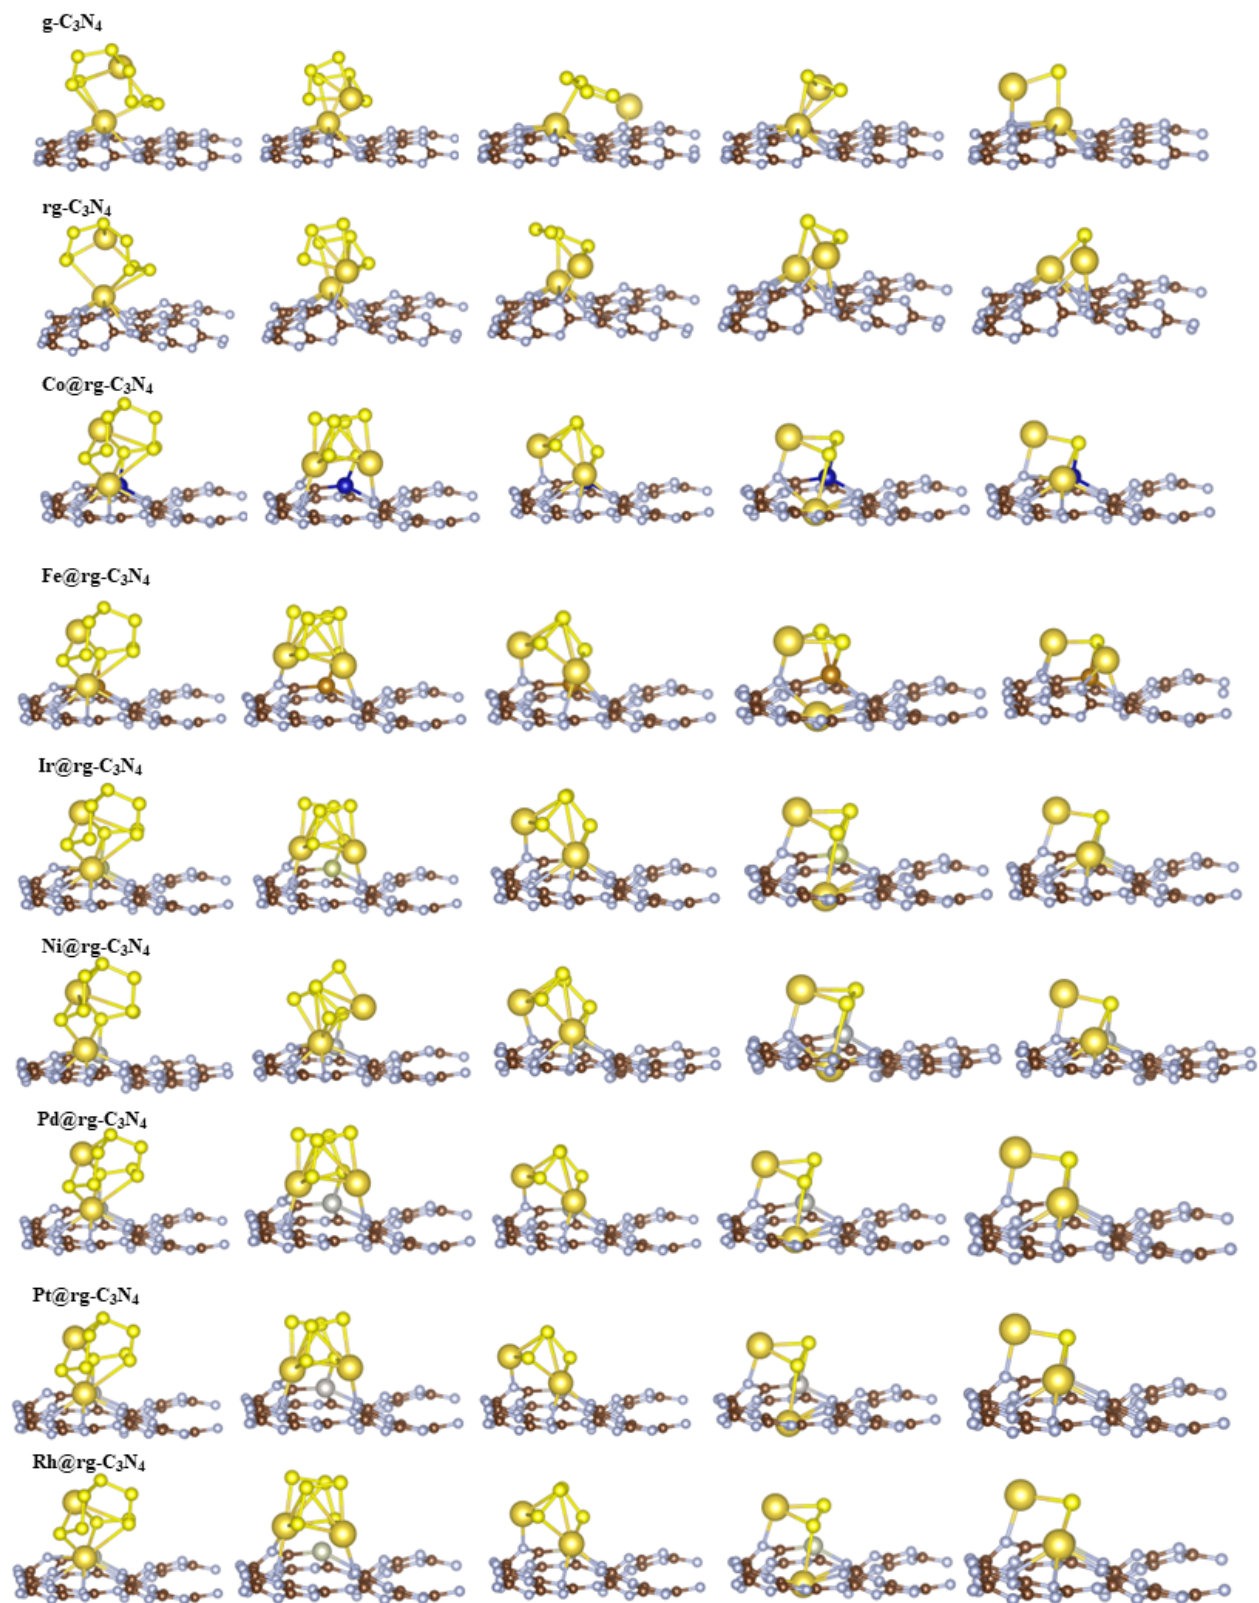

Figure S8: The optimized geometric configurations of  $\text{Na}_2\text{S}_n$ ;  $n=1, 2, 4, 6, 8$  species on  $\text{g-C}_3\text{N}_4$ ,  $\text{rg-C}_3\text{N}_4$  and  $\text{SA@rg-C}_3\text{N}_4$  (SA = Co, Fe, Ir, Ni, Pd, Pt and Rh)

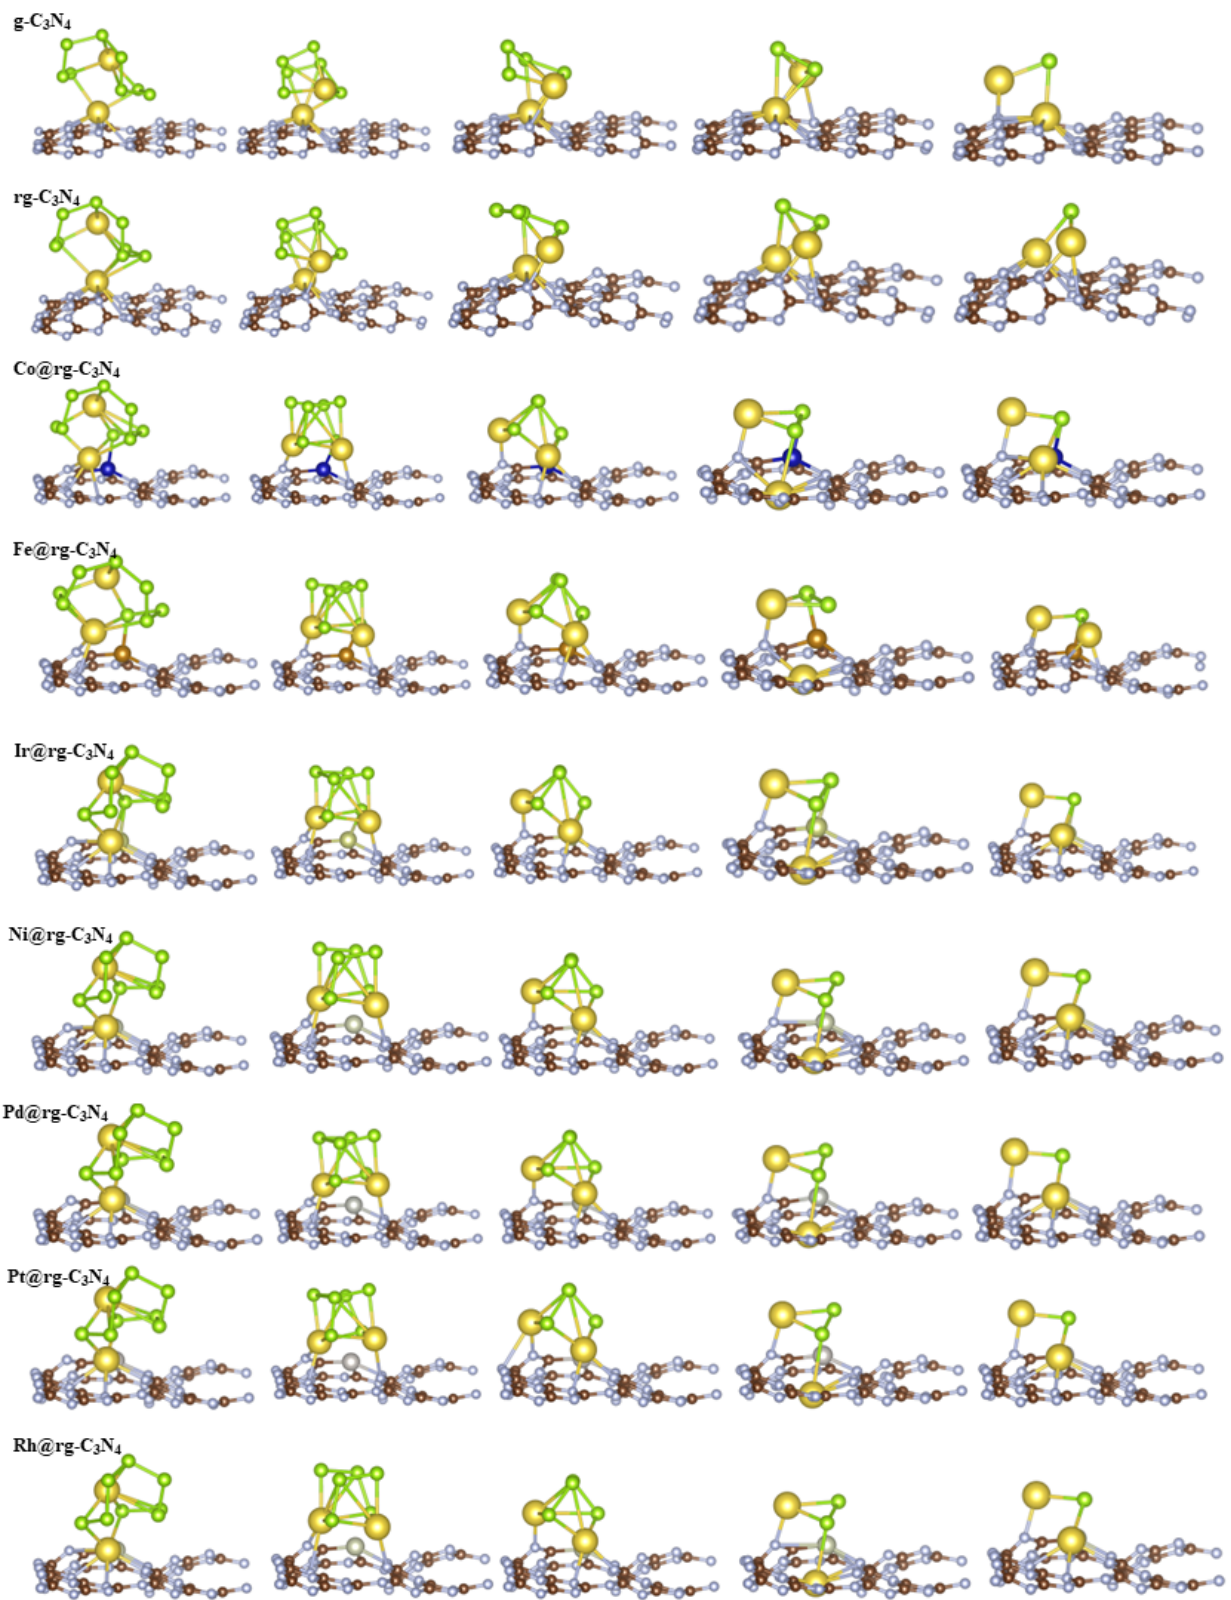

Figure S9: The optimized geometric configurations of  $\text{Na}_2\text{Se}_n$  ( $n=1, 2, 4, 6, 8$ ) species on  $\text{g-C}_3\text{N}_4$ ,  $\text{rg-C}_3\text{N}_4$ , and  $\text{SA@rg-C}_3\text{N}_4$  ( $\text{SA} = \text{Co, Fe, Ir, Ni, Pd, Pt, and Rh}$ )

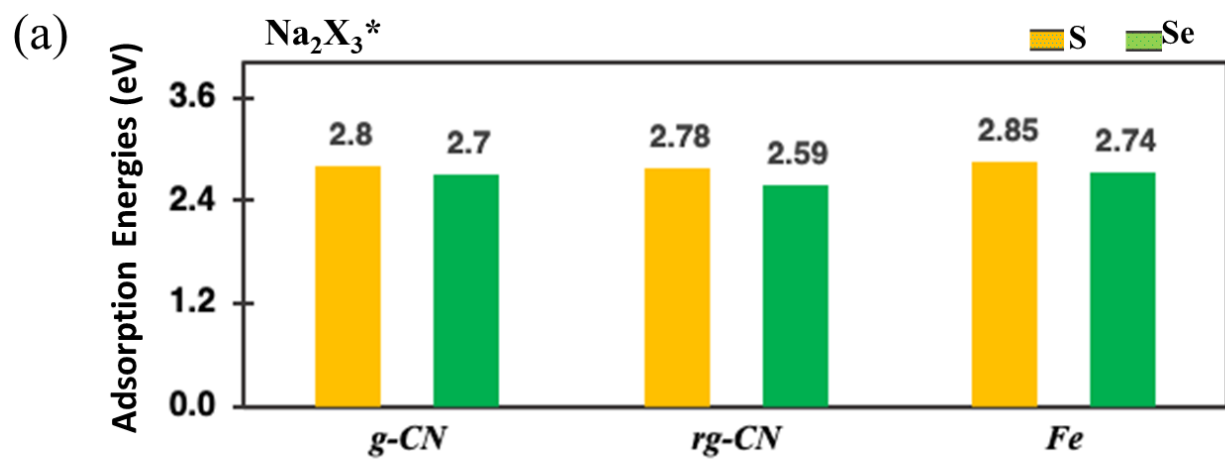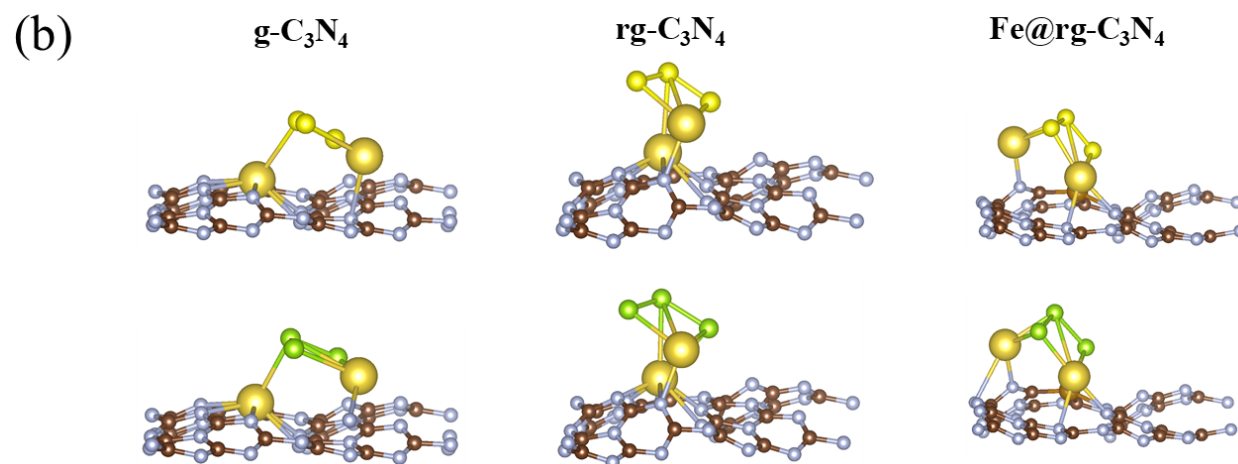

Figure S10: (a) The adsorption energies and (b) optimized geometric configurations of Na<sub>2</sub>X adsorbed on Pristine, reduced and Fe@rg-C<sub>3</sub>N<sub>4</sub>

# Optimized Geometries of Electrolyte Solvent (DOL and DME)

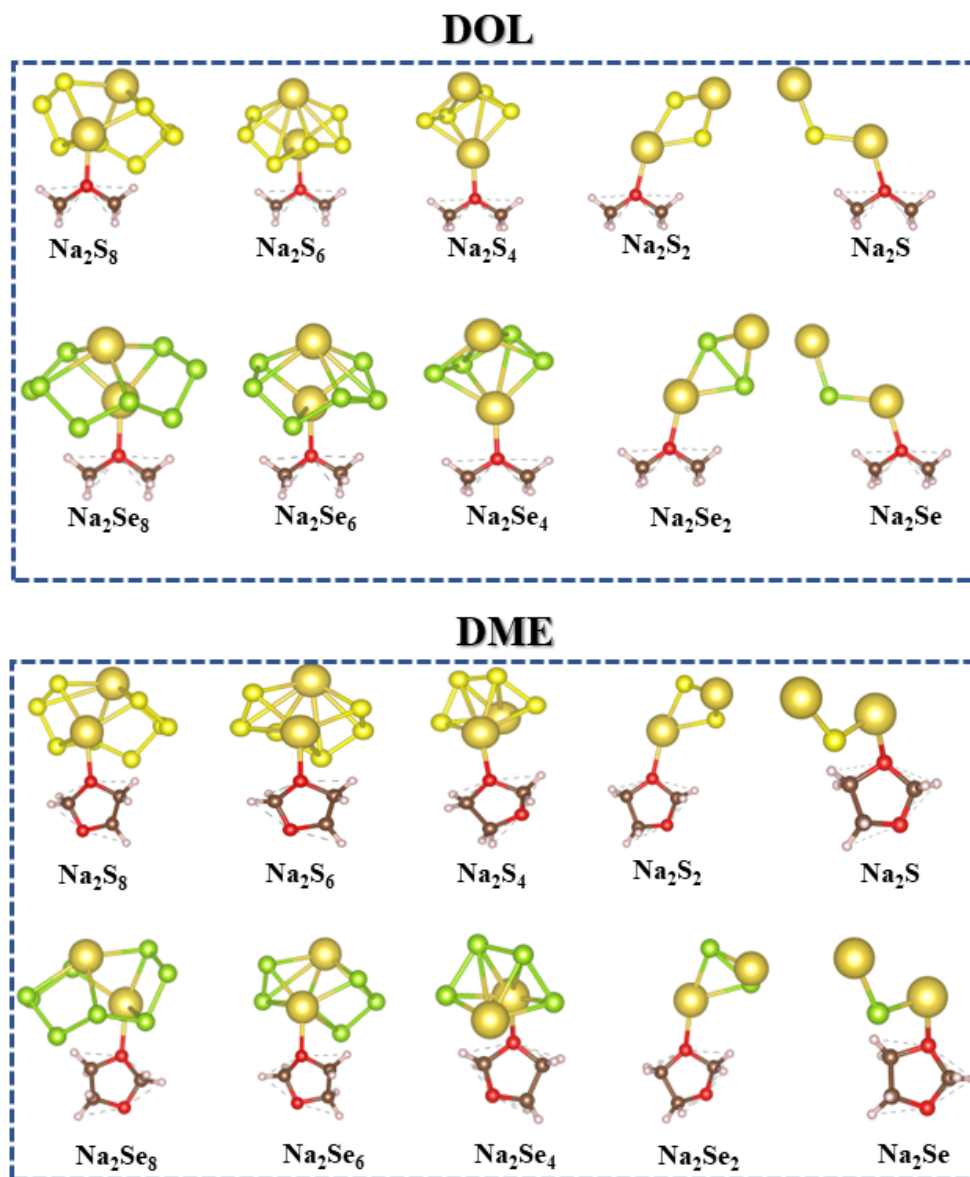

Figure S11: The optimized geometric configurations of  $\text{Na}_2\text{X}_n$  ( $n=1, 2, 4, 6, 8$ ) species adsorbed on 1,3-dioxolane (DOL) and 1,2 dimethoxymethane (DME) electrolyte solvent

# Gibbs free energy profile for sulfur/selenium reduction reaction (S/SeRR)

Overall, the reduction reaction of a sulfur ( $S_8$ ) or selenium ( $Se_8$ ) molecule in the discharging process of Na–S or Na–Se batteries is a 16-electron process, resulting in the generation of eight  $Na_2S$  or  $Na_2Se$  molecules, respectively.<sup>2-4</sup>

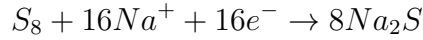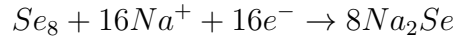

The elementary steps of forming one  $Na_2S/Na_2Se$  molecule in the S/Se reduction reaction (S/SeRR) process are shown as follows, based on a model of Na-pS/Ses disproportionation reactions:

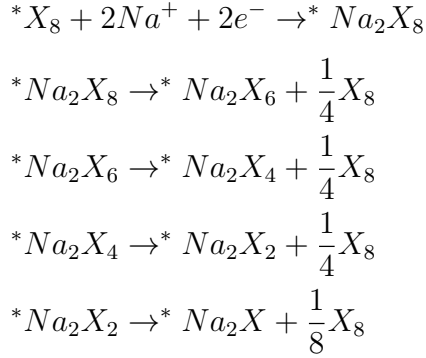

where \* stands for an active site on the catalytic surface and X= S, Se.

For each step of S/Se reduction reaction (S/SeRR), the reaction Gibbs free energy is given by:

$$\Delta G = \Delta E + \Delta E_{ZPE} - T\Delta S$$

where:  $\Delta E$  is the total energy calculated from the DFT calculations,  $\Delta E_{ZPE}$  is the con-

tribution of zero-point energy to the free energy,  $\Delta S$  is the contribution of entropy to the free energy. The values of  $\Delta E_{ZPE}$  and  $\Delta S$  are determined by the vibrational frequency computations, and herein  $T$  is the temperature (298.15 K).

The free energy change for the S/SeRR electrochemical steps can be obtained from the following expressions:

$$\begin{aligned}
\Delta G_1 &= (E_{*Na_2X_8} + E_{ZPE(*Na_2X_8)} - TS_{*Na_2X_8}) \\
&\quad - (E_{*X_8} + E_{ZPE(*X_8)} - TS_{*X_8}) - 2(E_{Na} + E_{ZPE(Na)} - TS_{Na}) \\
\Delta G_2 &= (E_{*Na_2X_6} + E_{ZPE(*Na_2X_6)} - TS_{*Na_2X_6}) \\
&\quad - \frac{1}{4}(E_{X_8} + E_{ZPE(X_8)} - TS_{X_8}) - (E_{*Na_2X_8} + E_{ZPE(*Na_2X_8)} - TS_{*Na_2X_8}) \\
\Delta G_3 &= (E_{*Na_2X_4} + E_{ZPE(*Na_2X_4)} - TS_{*Na_2X_4}) \\
&\quad - \frac{1}{4}(E_{X_8} + E_{ZPE(X_8)} - TS_{X_8}) - (E_{*Na_2X_6} + E_{ZPE(*Na_2X_6)} - TS_{*Na_2X_6}) \\
\Delta G_4 &= (E_{*Na_2X_2} + E_{ZPE(*Na_2X_2)} - TS_{*Na_2X_2}) \\
&\quad - \frac{1}{4}(E_{X_8} + E_{ZPE(X_8)} - TS_{X_8}) - (E_{*Na_2X_4} + E_{ZPE(*Na_2X_4)} - TS_{*Na_2X_4}) \\
\Delta G_5 &= (E_{*Na_2X} + E_{ZPE(*Na_2X)} - TS_{*Na_2X}) \\
&\quad - \frac{1}{8}(E_{X_8} + E_{ZPE(X_8)} - TS_{X_8}) - (E_{*Na_2X_2} + E_{ZPE(*Na_2X_2)} - TS_{*Na_2X_2})
\end{aligned}$$

The largest  $\Delta G$  will determine the overall speed of the Na-X battery reaction, and the corresponding reaction step is called rate determining (RD) step.

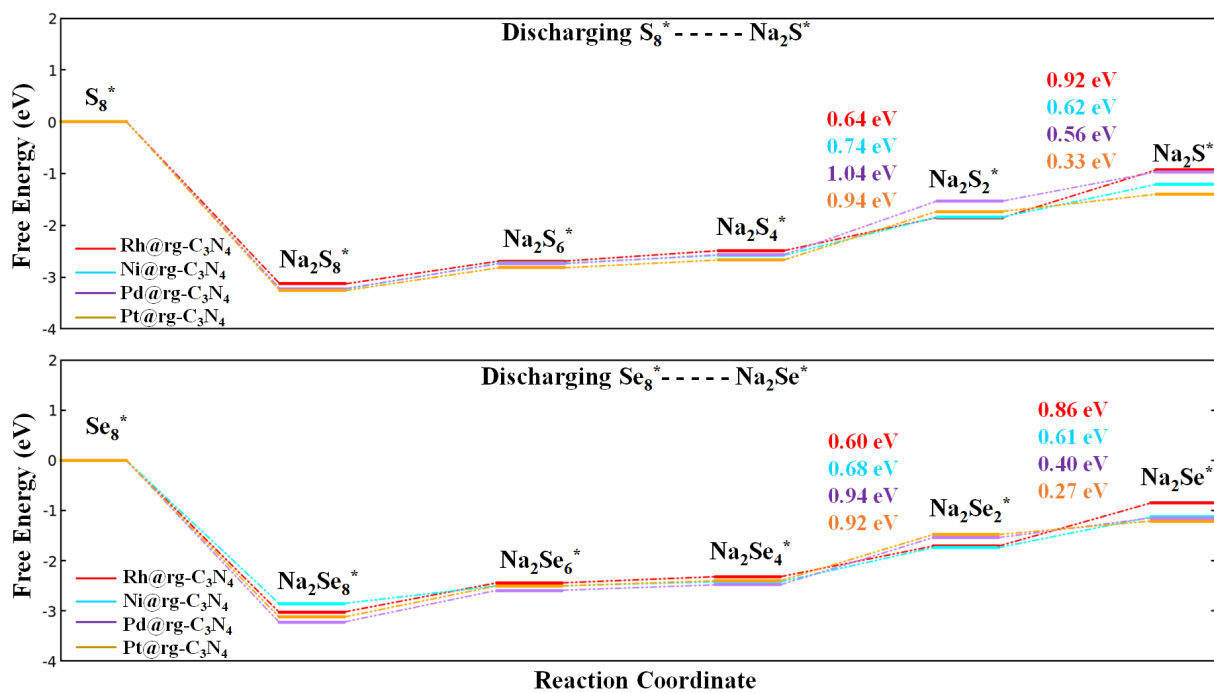

Figure S12: Energy profiles for the reduction of Na-pXs (X= S, Se) on the SA@rg-C<sub>3</sub>N<sub>4</sub> (SA= Rh, Ni, Pd and Pt) monolayer.



## Partial Density of States (PDOS) of Na<sub>2</sub>X-SA

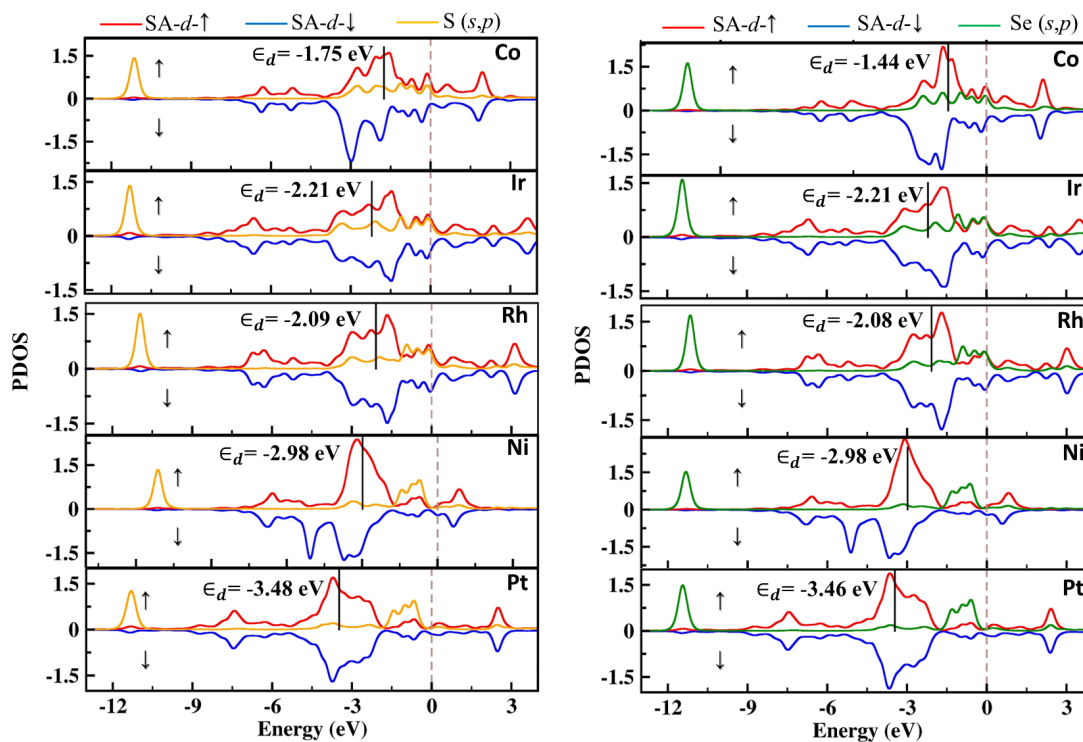

Figure S13: The calculated partial density of states (PDOS) of Na<sub>2</sub>X-SAC (Co, Ir, Rh, Ni and Pt) adsorption system

## References

- (1) Li, N.; Zhan, Y.; Wu, H.; Fan, J.; Jia, J. Covalent surface modification of bifunctional two-dimensional metal carbide MXenes as sulfur hosts for sodium–sulfur batteries. *Nanoscale* **2022**, *14*, 17027–17035.
- (2) Wei, C.; Ge, M.; Fang, T.; Tang, X.; Liu, X. Rational design of MXene-based single atom catalysts for Na–Se batteries from sabatier principle. *Physical Chemistry Chemical Physics* **2023**, *25*, 24948–24959.
- (3) Jayan, R.; Islam, M. M. Mechanistic Insights into Interactions of Polysulfides at VS<sub>2</sub> Interfaces in Na–S Batteries: A DFT Study. *ACS Applied Materials & Interfaces* **2021**, *13*, 35848–35855.
- (4) Assary, R. S.; Curtiss, L. A.; Moore, J. S. Toward a molecular understanding of energetics in Li–S batteries using nonaqueous electrolytes: a high-level quantum chemical study. *The Journal of Physical Chemistry C* **2014**, *118*, 11545–11558.
